# Supplementary material for: Engineering cell-based microstructures to study the effect of structural complexity on in vitro bioaccessibility of a lipophilic bioactive compound
Source: Royal Society of Chemistry journal article supplement (doi:10.1039/d2fo00533f), 2022-01-01
Supplement: d2fo00533f1.pdf [file d2fo00533f1.pdf]

## Supplementary materials

**Table S1: Haralick features extracted from confocal microscopic images of single cell or cell cluster-laden alginate films: angular second moment (ASM), contrast, and correlation.**

| <b>Cell microstructures</b> | <b>ASM</b>             | <b>Contrast</b>               | <b>Correlation</b>     |
|-----------------------------|------------------------|-------------------------------|------------------------|
| Native                      | 0.31±0.03 <sup>a</sup> | 24402.92±1775.47 <sup>a</sup> | 0.19±0.03 <sup>a</sup> |
| P/D cluster                 | 0.37±0.01 <sup>a</sup> | 17761.47±780.76 <sup>b</sup>  | 0.37±0.02 <sup>b</sup> |
| P+P/A cluster               | 0.53±0.06 <sup>b</sup> | 11511.34±1877.12 <sup>c</sup> | 0.47±0.03 <sup>c</sup> |

\* Data are shown as mean±SD of n=5 images. One-way ANOVA model results showed significant main effect of cell microstructures for all three features. Different superscript lowercase letters indicate significant difference among films with different cell microstructures (p<0.05).

**Table S2: Estimated parameters of the empirical swelling kinetics models for single cell or cell cluster-laden alginate films in enzyme-free, bile salt-free SGF and SIF.**

| Condition                  | Cell microstructures | Peppas's model |      |                | Peleg's model  |                |      | Exponential association equation model |      |
|----------------------------|----------------------|----------------|------|----------------|----------------|----------------|------|----------------------------------------|------|
|                            |                      | k              | n    | R <sup>2</sup> | k <sub>1</sub> | k <sub>2</sub> | RMSE | k <sub>R1</sub>                        | RMSE |
| Enzyme-free SGF            | Native               | 0.38           | 0.15 | 0.81           | 5.00           | 0.36           | 0.21 | 0.05                                   | 0.43 |
|                            | P/D cluster          | 0.41           | 0.15 | 0.77           | 4.35           | 0.33           | 0.26 | 0.04                                   | 0.41 |
|                            | P+P/A cluster        | 0.40           | 0.15 | 0.78           | 4.35           | 0.30           | 0.24 | 0.04                                   | 0.47 |
| Enzyme, bile salt-free SIF | Native               | 0.22           | 0.23 | 0.91           | 6.31           | 0.20           | 0.57 | 0.02                                   | 1.31 |
|                            | P/D cluster          | 0.30           | 0.19 | 0.84           | 4.40           | 0.21           | 0.44 | 0.02                                   | 0.97 |
|                            | P+P/A cluster        | 0.34           | 0.17 | 0.78           | 3.80           | 0.22           | 0.45 | 0.03                                   | 0.82 |

**Table S3: Statistical summary of the two-way ANOVA model for the fraction retention of curcumin association with cell clustering and ECM for each time point during *in vitro* gastric and intestinal digestion. \***

| Sources of variance | p-value for curcumin retention fraction in: |           |                    |           |           |           |                   |           |           |           |
|---------------------|---------------------------------------------|-----------|--------------------|-----------|-----------|-----------|-------------------|-----------|-----------|-----------|
|                     | SGF                                         |           | High bile salt SIF |           |           |           | Low bile salt SIF |           |           |           |
|                     | 1 hour                                      | 2 hours   | 0 hour             | 1 hour    | 2 hours   | 3 hours   | 0 hour            | 1 hour    | 2 hours   | 3 hours   |
| Cell clustering     | 1.71 e-02                                   | 1.88 e-01 | 1.05 e-02          | 2.30 e-02 | 6.41 e-04 | 1.04 e-02 | 5.31 e-03         | 2.95 e-02 | 5.05 e-02 | 4.60 e-01 |
| ECM                 | 1.21 e-02                                   | 8.65 e-03 | 5.59 e-10          | 2.90 e-08 | 3.96 e-07 | 2.70 e-07 | 3.34 e-05         | 3.24 e-04 | 3.16 e-07 | 5.77 e-03 |
| Cell clustering*ECM | 1.29 e-01                                   | 2.04 e-02 | 2.29 e-02          | 3.36 e-02 | 1.64 e-03 | 3.11 e-02 | 1.07 e-02         | 3.15 e-02 | 9.42 e-02 | 5.96 e-01 |

\* SGF = simulated gastric fluid, SIF = simulated intestinal fluid. The sources of variance in this model are effects from cell clustering and ECM, as well as their interaction effect. Shaded table cells are significant values ( $p < 0.05$ ).

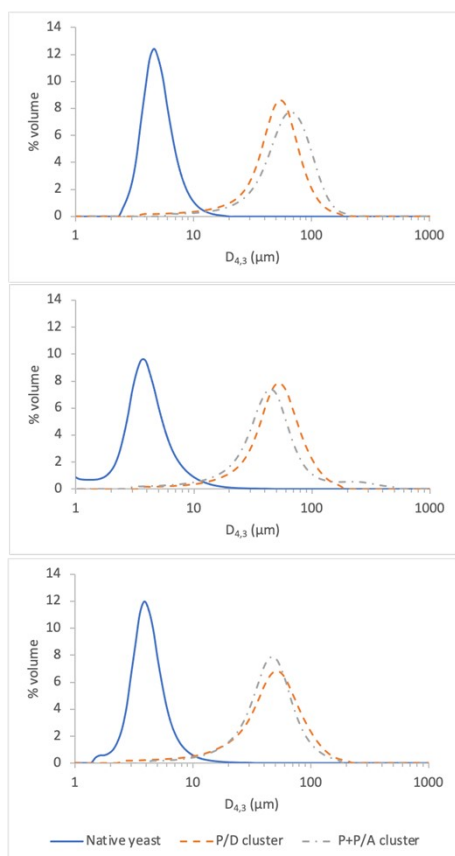

|                   | <b>Native</b>                         | <b>P+P/A cluster</b> | <b>P/D cluster</b> |
|-------------------|---------------------------------------|----------------------|--------------------|
| <b>Percentile</b> | <b>Before digestion</b>               |                      |                    |
| 10                | 3.32                                  | 28.54                | 23.04              |
| 50                | 4.64                                  | 60.14                | 49.40              |
| 90                | 7.13                                  | 102.2                | 82.37              |
| <b>Percentile</b> | <b>After low bile salt digestion</b>  |                      |                    |
| 10                | 2.14                                  | 18.03                | 21.47              |
| 50                | 3.66                                  | 41.53                | 48.09              |
| 90                | 6.59                                  | 90.18                | 85.38              |
| <b>Percentile</b> | <b>After high bile salt digestion</b> |                      |                    |
| 10                | 19.64                                 | 17.73                | 17.25              |
| 50                | 43.18                                 | 40.47                | 46.20              |
| 90                | 77.00                                 | 71.26                | 88.03              |

**Fig. S1: Particle size distribution of native yeast, P/D cluster, and P+P/A cluster before digestion (a), after low bile salt digestion (b), and after high bile salt digestion (c). The 10<sup>th</sup>, 50<sup>th</sup>, and 90<sup>th</sup> percentile particle diameter for each plotted distribution is summarized in the table.**

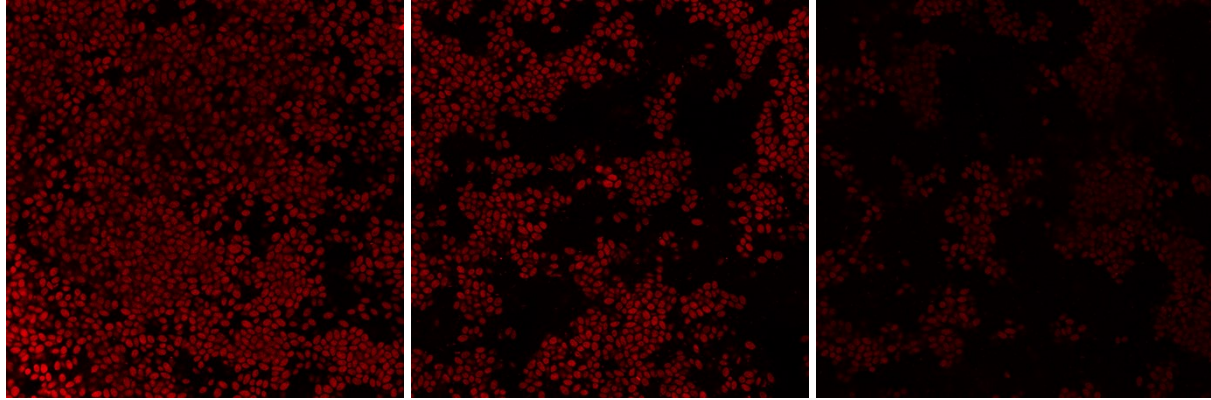

***Fig. S2. Individual slice in the z stack confocal microscope images of native cell (left), P/D cluster (middle), and P+P/A cluster (right) in alginate film.*** Figure 6 showed the 3D projection of the same z stack for each cell microstructure. A pulsed laser tuned to 488 nm was used for excitation and emission signals were detected in the range of 498-591 nm. The images were taken using a 20X objective.

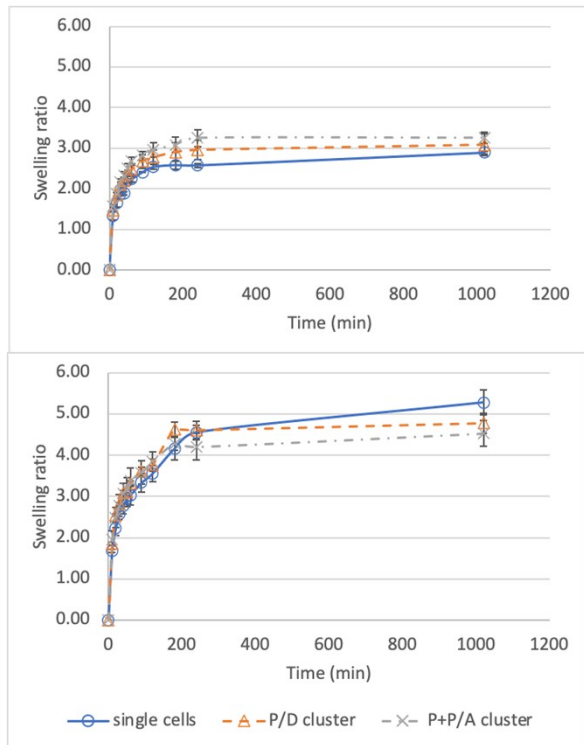

**Fig. S3: Swelling kinetics of single cell or cell cluster-laden alginate films in enzyme-free SGF (a) and enzyme-free, bile salt-free SIF (b).**
